# Supplementary material for: Liver Impairment—The Potential Application of Volatile Organic Compounds in Hepatology
Source: MDPI journal article supplement (doi:10.3390/metabo11090618), 2021-09-11
Supplement: s1 [file s1]

## Supplementary materials

Table S1: Added questions to further and more strictly evaluate the papers included in the present review.

| Added questions                                                                                                                                                                                                                                                                                                                                                                                                                                                                                                                                                                                                                                                                                               |
|---------------------------------------------------------------------------------------------------------------------------------------------------------------------------------------------------------------------------------------------------------------------------------------------------------------------------------------------------------------------------------------------------------------------------------------------------------------------------------------------------------------------------------------------------------------------------------------------------------------------------------------------------------------------------------------------------------------|
| <ol style="list-style-type: none"> <li>1) Did the authors correct or control for confounding factors such as diet, smoking, alcohol, medication, and place/time of sample collection?</li> <li>2) Was the sample size sufficient?</li> <li>3) Did the authors perform any statistical analysis? If so, did they correct for multiple testing? Also, did the authors validate their results? If so, did they perform internal (within the same cohort) or even external (new independent cohort) validation or both?</li> <li>4) Where the study classes balanced?</li> <li>5) Did the authors give the biological or non-biological origin of the compounds they found significant in their study?</li> </ol> |

Table S2: Added question comments as to why each publication was given its respective quality value. If no explanation is given, it means that all issues raised in the added questions were addressed by that particular study.

| Publication                    | Quality | Explanation                                                                                                                                                        |
|--------------------------------|---------|--------------------------------------------------------------------------------------------------------------------------------------------------------------------|
| Friedman et al. 1994 [48]      | Medium  | They did not mitigate for confounding factors; small sample size; they did not establish the origin of the found compounds; no statistical modelling was performed |
| Hiroshi et al. 1978 [46]       | Low     | They did not mitigate for confounding factors; small sample size; they did not establish the origin of the found compounds; no statistical modelling was performed |
| Letteron et al. 1993 [69]      | Medium  | They did not validate their results in terms of statistical modelling; imbalanced study classes; they did not establish the origin of the found compounds          |
| Van den Velde et al. 2008 [34] | High    | -                                                                                                                                                                  |
| Dadamio et al. 2012 [49]       | High    | -                                                                                                                                                                  |
| Pijls et al. 2016 [51]         | High    | -                                                                                                                                                                  |
| Morisco et al. 2013 [22]       | High    | They did not validate their results in terms of statistical modelling                                                                                              |
| Del Rio et al. 2015 [50]       | High    | They did not validate their results in terms of statistical modelling                                                                                              |
| Eng et al. 2015 [56]           | High    | They did not validate their results in terms of statistical modelling                                                                                              |
| Alkhouri et al. 2015 [60]      | High    | They did not mitigate for confounding factors; imbalanced study classes                                                                                            |
| De Vincentis et al. 2016 [52]  | Medium  | They did not validate their results in terms of statistical modelling; no compounds were identified (due to the e-nose technology itself)                          |
| Khalid et al. 2013 [61]        | Medium  | They did not mitigate for confounding factors; imbalanced study classes                                                                                            |
| O'Hara et al. 2016 [45]        | High    | They did not validate their results in terms of statistical modelling                                                                                              |
| Arasaradnam et al. 2015 [74]   | Medium  | Small sample size; imbalanced study classes; they did not establish the origin of the found compounds                                                              |
| Solga et al. 2006 [5]          | Medium  | They did not mitigate for confounding factors; they did not validate their results in terms of statistical modelling                                               |
| Verdam et al. 2013 [66]        | Medium  | They did not mitigate for confounding factors; they did not validate their results in terms of statistical modelling                                               |
| Alkhouri et al. 2013 [67]      | Medium  | They did not mitigate for confounding factors                                                                                                                      |
| Millonig et al. 2010 [36]      | High    | -                                                                                                                                                                  |

|                              |        |                                                                                                                                      |
|------------------------------|--------|--------------------------------------------------------------------------------------------------------------------------------------|
| Hanounch et al. 2014 [21]    | High   | -                                                                                                                                    |
| Qin et al. 2010 [62]         | Medium | They did not validate their results in terms of statistical modelling; imbalanced study classes                                      |
| Sinha et al. 2019 [68]       | Medium | Small sample size                                                                                                                    |
| Ferrandino et al. 2020 [63]  | Medium | They did not mitigate for confounding factors                                                                                        |
| Miller-Atkins et al. [64]    | High   | -                                                                                                                                    |
| Raman et al. 2013 [72]       | Medium | They did not mitigate for confounding factors; they did not validate their results in terms of statistical modelling                 |
| Navaneethan et al. 2015 [38] | Medium | Small sample size; they did not validate their results in terms of statistical modelling                                             |
| Navaneethan et al. 2015 [73] | Medium | They did not validate their results in terms of statistical modelling                                                                |
| Arasradnam et al. 2012 [65]  | Medium | They did not mitigate for confounding factors; small sample size; no compounds were identified (due to the e-nose technology itself) |
| Bannaga et al. 2021 [75]     | Medium | They did not mitigate for confounding factors; small sample size                                                                     |
